# Supplementary material for: Synthesis, characterization and dioxygen reactivity of copper(i) complexes with glycoligands
Source: Royal Society of Chemistry journal article supplement (doi:10.1039/b801109e), 2008-01-01
Supplement: b801109e.pdf [file b801109e.pdf]

## Electronic supplementary information (ESI)

### Synthesis, characterization, and dioxygen reactivity of copper(I) complexes with glycoligands

Ziad Damaj, Federico Cisnetti, Laurent Dupont, Eric Henon, Clotilde Policar\* Emmanuel Guillon\*

#### Contents:

Pages 2-3: Graphical representations of some  $\text{Cu}^{\text{I}}\text{L}_3$ ,  $\text{Cu}^{\text{I}}\text{L}_4$ ,  $\text{Cu}^{\text{II}}\text{L}_3$ , and  $\text{Cu}^{\text{II}}\text{L}_4$  complexes: Fig.S1, Fig. S2, Fig.S3.

Pages 4-15: ZPE corrected energies and PCM HF-DFT (B3LYP)/6-31G\* optimized geometries in pdb format.

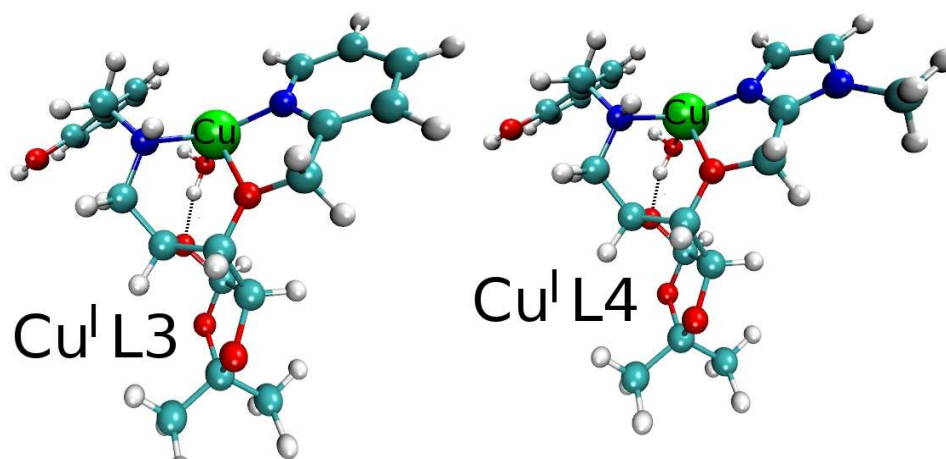

Fig.S1 Tetrahedral structures for  $\text{Cu}^{\text{I}}\text{L3}$  and  $\text{Cu}^{\text{I}}\text{L4}$ ; PCM HF-DFT (B3LYP)/6-31G\* optimized geometries

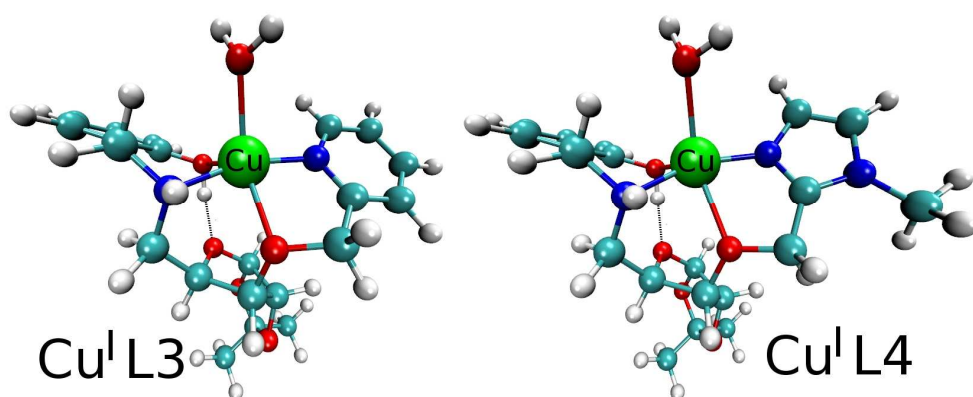

Fig. S2 Other possible pentacoordinate distorted square pyramidal structures for  $\text{Cu}^{\text{I}}\text{L3}$  and  $\text{Cu}^{\text{I}}\text{L4}$ ; PCM HF-DFT (B3LYP)/6-31G\* optimized geometries

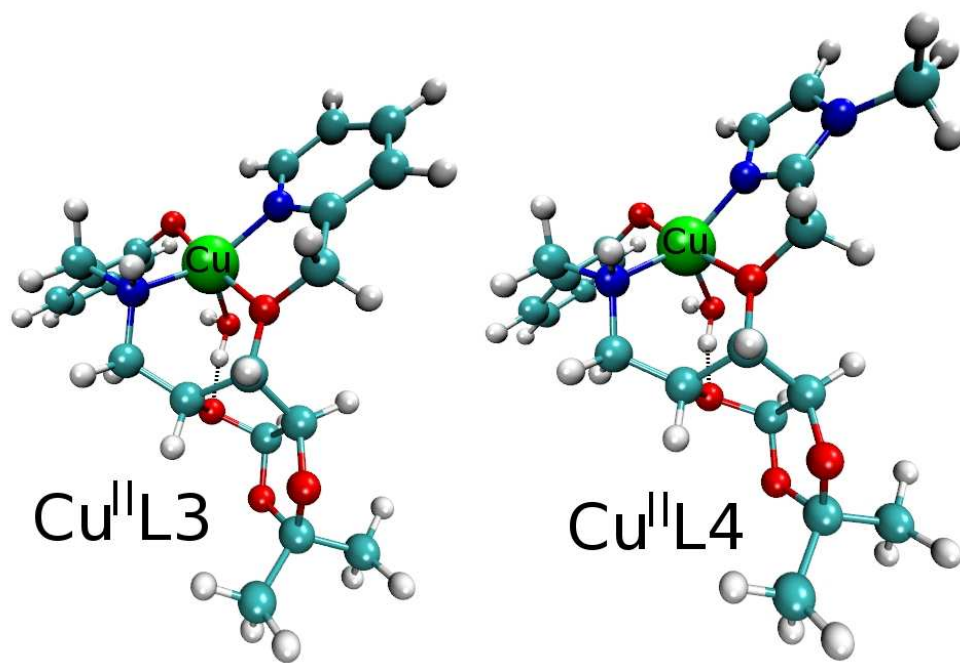

Fig. S3 Pentacoordinate distorted square pyramidal structures for  $\text{Cu}^{\text{II}}\text{L3}$  and  $\text{Cu}^{\text{II}}\text{L4}$ ; PCM HF-DFT (B3LYP)/6-31G\*

Cu<sup>I</sup>L1 HF-DFT (B3LYP)/6-31G\*/PCM optimized structure

ZPE corrected energy = -2900.959580 hartree

(pdb format)

HEADER

```
HETATM 1 CU 2 2 -1.318 0.194 0.527
HETATM 2 N 2 2 -2.087 -1.480 -0.076
HETATM 3 N 2 2 -1.500 1.999 -0.100
HETATM 4 O 2 2 -0.984 -0.131 2.587
HETATM 5 H 2 2 -1.532 -0.739 3.105
HETATM 6 H 2 2 -0.071 -0.515 2.602
HETATM 7 C 2 2 -1.406 -2.240 -0.965
HETATM 8 C 2 2 -1.831 -3.510 -1.344
HETATM 9 C 2 2 -3.010 -4.022 -0.804
HETATM 10 C 2 2 -3.717 -3.244 0.111
HETATM 11 C 2 2 -3.220 -1.991 0.450
HETATM 12 C 2 2 -0.176 -1.597 -1.552
HETATM 13 H 2 2 -1.244 -4.086 -2.052
HETATM 14 H 2 2 -3.364 -5.008 -1.088
HETATM 15 H 2 2 -4.638 -3.598 0.562
HETATM 16 C 2 2 -0.550 2.935 0.126
HETATM 17 C 2 2 -0.596 4.199 -0.458
HETATM 18 C 2 2 -1.667 4.531 -1.285
HETATM 19 C 2 2 -2.659 3.577 -1.506
HETATM 20 C 2 2 -2.533 2.331 -0.906
HETATM 21 C 2 2 0.526 2.562 1.125
HETATM 22 H 2 2 0.197 4.913 -0.258
HETATM 23 H 2 2 -1.723 5.511 -1.749
HETATM 24 H 2 2 -3.514 3.785 -2.140
HETATM 25 H 2 2 -3.277 1.558 -1.065
HETATM 26 H 2 2 -3.747 -1.359 1.159
HETATM 27 O 2 2 0.518 -0.932 -0.494
HETATM 28 O 2 2 0.887 1.186 1.058
HETATM 29 H 2 2 1.404 3.208 1.006
HETATM 30 H 2 2 0.134 2.707 2.138
HETATM 31 H 2 2 -0.466 -0.856 -2.314
HETATM 32 H 2 2 0.458 -2.349 -2.035
HETATM 33 C 2 2 1.604 -0.118 -0.916
HETATM 34 C 2 2 1.994 0.822 0.252
HETATM 35 H 2 2 2.466 1.713 -0.173
HETATM 36 H 2 2 1.349 0.425 -1.833
HETATM 37 C 2 2 2.886 -0.946 -1.064
HETATM 38 C 2 2 3.057 0.003 1.054
HETATM 39 O 2 2 3.301 -1.185 0.273
HETATM 40 C 2 2 2.652 -0.450 2.452
HETATM 41 H 2 2 2.410 0.414 3.074
HETATM 42 O 2 2 1.505 -1.300 2.448
HETATM 43 H 2 2 3.503 -0.978 2.904
HETATM 44 H 2 2 1.596 -1.891 1.679
HETATM 45 O 2 2 3.787 -0.164 -1.788
HETATM 46 H 2 2 2.749 -1.936 -1.519
HETATM 47 C 2 2 5.046 -0.795 -2.027
HETATM 48 H 2 2 5.636 -0.093 -2.619
HETATM 49 H 2 2 5.565 -1.015 -1.088
HETATM 50 H 2 2 4.913 -1.727 -2.594
HETATM 51 H 2 2 3.986 0.581 1.136
```

Cu<sup>I</sup>L2 HF-DFT (B3LYP)/6-31G\*/PCM optimized structure

ZPE corrected energy = -2825.744659 hartree

(pdb format)

HEADER

|        |    |    |   |   |        |        |        |
|--------|----|----|---|---|--------|--------|--------|
| HETATM | 1  | H  | 2 | 2 | 0.041  | 3.833  | 1.174  |
| HETATM | 2  | C  | 2 | 2 | 0.640  | 3.169  | 0.541  |
| HETATM | 3  | O  | 2 | 2 | 1.299  | 4.030  | -0.384 |
| HETATM | 4  | C  | 2 | 2 | 1.658  | 2.491  | 1.479  |
| HETATM | 5  | C  | 2 | 2 | 2.007  | 3.364  | -1.434 |
| HETATM | 6  | C  | 2 | 2 | 1.061  | 2.519  | -2.285 |
| HETATM | 7  | H  | 2 | 2 | 2.459  | 4.163  | -2.027 |
| HETATM | 8  | H  | 2 | 2 | 2.819  | 2.745  | -1.029 |
| HETATM | 9  | C  | 2 | 2 | 0.300  | 1.513  | -1.412 |
| HETATM | 10 | H  | 2 | 2 | 0.333  | 3.175  | -2.777 |
| HETATM | 11 | H  | 2 | 2 | 1.613  | 2.003  | -3.080 |
| HETATM | 12 | C  | 2 | 2 | -0.339 | 2.245  | -0.223 |
| HETATM | 13 | H  | 2 | 2 | -0.494 | 1.021  | -1.996 |
| HETATM | 14 | O  | 2 | 2 | 1.149  | 0.501  | -0.861 |
| HETATM | 15 | H  | 2 | 2 | -1.131 | 2.885  | -0.631 |
| HETATM | 16 | O  | 2 | 2 | -0.895 | 1.296  | 0.688  |
| HETATM | 17 | H  | 2 | 2 | 2.169  | 1.652  | 0.999  |
| HETATM | 18 | H  | 2 | 2 | 2.396  | 3.260  | 1.731  |
| HETATM | 19 | O  | 2 | 2 | 0.993  | 2.041  | 2.677  |
| HETATM | 20 | H  | 2 | 2 | 1.608  | 2.149  | 3.419  |
| HETATM | 21 | C  | 2 | 2 | 1.548  | -0.533 | -1.753 |
| HETATM | 22 | C  | 2 | 2 | -2.304 | 1.276  | 0.880  |
| HETATM | 23 | C  | 2 | 2 | 2.025  | -1.694 | -0.920 |
| HETATM | 24 | C  | 2 | 2 | 3.203  | -2.380 | -1.197 |
| HETATM | 25 | C  | 2 | 2 | 3.561  | -3.471 | -0.405 |
| HETATM | 26 | C  | 2 | 2 | 2.725  | -3.829 | 0.652  |
| HETATM | 27 | C  | 2 | 2 | 1.570  | -3.088 | 0.872  |
| HETATM | 28 | N  | 2 | 2 | 1.208  | -2.039 | 0.104  |
| HETATM | 29 | H  | 2 | 2 | 3.830  | -2.059 | -2.022 |
| HETATM | 30 | H  | 2 | 2 | 4.474  | -4.023 | -0.606 |
| HETATM | 31 | H  | 2 | 2 | 2.960  | -4.666 | 1.300  |
| HETATM | 32 | H  | 2 | 2 | 0.896  | -3.341 | 1.685  |
| HETATM | 33 | H  | 2 | 2 | -2.463 | 1.123  | 1.954  |
| HETATM | 34 | H  | 2 | 2 | -2.757 | 2.237  | 0.608  |
| HETATM | 35 | C  | 2 | 2 | -2.954 | 0.139  | 0.117  |
| HETATM | 36 | C  | 2 | 2 | -4.275 | 0.210  | -0.318 |
| HETATM | 37 | C  | 2 | 2 | -4.851 | -0.900 | -0.934 |
| HETATM | 38 | C  | 2 | 2 | -4.077 | -2.048 | -1.098 |
| HETATM | 39 | C  | 2 | 2 | -2.763 | -2.037 | -0.650 |
| HETATM | 40 | N  | 2 | 2 | -2.196 | -0.967 | -0.051 |
| HETATM | 41 | H  | 2 | 2 | -4.843 | 1.124  | -0.173 |
| HETATM | 42 | H  | 2 | 2 | -5.879 | -0.866 | -1.282 |
| HETATM | 43 | H  | 2 | 2 | -4.478 | -2.939 | -1.571 |
| HETATM | 44 | H  | 2 | 2 | -2.125 | -2.907 | -0.770 |
| HETATM | 45 | CU | 2 | 2 | -0.348 | -0.982 | 0.505  |
| HETATM | 46 | H  | 2 | 2 | 0.686  | -0.844 | -2.366 |
| HETATM | 47 | H  | 2 | 2 | 2.341  | -0.196 | -2.432 |
| HETATM | 48 | O  | 2 | 2 | -0.110 | -0.505 | 2.572  |
| HETATM | 49 | H  | 2 | 2 | 0.397  | -1.030 | 3.210  |
| HETATM | 50 | H  | 2 | 2 | 0.239  | 0.419  | 2.635  |

Cu<sup>I</sup>L3 HF-DFT (B3LYP)/6-31G\*/PCM optimized structure

ZPE corrected energy = -3017.632633 hartree

Pentacoordinate distorted square pyramidal structure

(pdb format)

HEADER

```
HETATM 1 CU 2 2 -1.085 0.710 -0.012
HETATM 2 O 2 2 0.954 1.193 0.707
HETATM 3 N 2 2 -1.126 2.603 -0.085
HETATM 4 N 2 2 -1.015 -0.601 1.523
HETATM 5 O 2 2 -0.949 -0.482 -1.726
HETATM 6 H 2 2 -0.135 -0.997 -1.539
HETATM 7 H 2 2 -1.656 -1.137 -1.856
HETATM 8 C 2 2 1.446 -1.130 0.922
HETATM 9 O 2 2 1.423 -1.290 -0.516
HETATM 10 H 2 2 2.205 -1.812 1.325
HETATM 11 C 2 2 0.118 -1.565 1.544
HETATM 12 H 2 2 -0.194 -2.462 1.001
HETATM 13 C 2 2 2.605 -0.682 -1.044
HETATM 14 O 2 2 3.643 -1.607 -1.197
HETATM 15 H 2 2 2.325 -0.253 -2.009
HETATM 16 C 2 2 3.108 0.314 0.038
HETATM 17 O 2 2 4.268 -0.302 0.564
HETATM 18 H 2 2 3.312 1.318 -0.351
HETATM 19 C 2 2 -2.293 -1.275 1.927
HETATM 20 H 2 2 -2.116 -1.925 2.795
HETATM 21 H 2 2 -2.977 -0.480 2.233
HETATM 22 C 2 2 -2.901 -2.076 0.803
HETATM 23 C 2 2 -3.661 -1.433 -0.193
HETATM 24 C 2 2 -4.201 -2.157 -1.260
HETATM 25 C 2 2 -4.005 -3.538 -1.335
HETATM 26 C 2 2 -3.276 -4.197 -0.347
HETATM 27 C 2 2 -2.734 -3.462 0.710
HETATM 28 O 2 2 -3.849 -0.079 -0.067
HETATM 29 H 2 2 -4.789 -1.644 -2.020
HETATM 30 H 2 2 -4.434 -4.093 -2.164
HETATM 31 H 2 2 -3.131 -5.272 -0.393
HETATM 32 C 2 2 -2.153 3.290 -0.641
HETATM 33 C 2 2 -2.147 4.666 -0.817
HETATM 34 C 2 2 -1.025 5.391 -0.414
HETATM 35 C 2 2 0.038 4.698 0.160
HETATM 36 C 2 2 -0.046 3.317 0.320
HETATM 37 H 2 2 -3.006 2.696 -0.947
HETATM 38 H 2 2 -3.005 5.154 -1.267
HETATM 39 H 2 2 -0.977 6.467 -0.544
HETATM 40 H 2 2 0.930 5.223 0.490
HETATM 41 C 2 2 1.072 2.572 1.027
HETATM 42 H 2 2 2.044 2.977 0.721
HETATM 43 H 2 2 0.986 2.705 2.118
HETATM 44 C 2 2 1.991 0.298 1.094
HETATM 45 H 2 2 2.360 0.508 2.105
HETATM 46 H 2 2 -0.820 0.083 2.254
HETATM 47 C 2 2 4.789 -1.201 -0.424
HETATM 48 C 2 2 5.372 -2.413 0.280
HETATM 49 H 2 2 5.736 -3.135 -0.456
HETATM 50 H 2 2 6.208 -2.111 0.918
HETATM 51 H 2 2 4.609 -2.892 0.899
HETATM 52 C 2 2 5.791 -0.486 -1.329
HETATM 53 H 2 2 6.131 -1.161 -2.121
HETATM 54 H 2 2 5.334 0.391 -1.799
HETATM 55 H 2 2 6.658 -0.157 -0.748
HETATM 56 H 2 2 0.318 -1.873 2.581
HETATM 57 H 2 2 -2.179 -3.975 1.491
HETATM 58 H 2 2 -4.526 0.210 -0.701
```

Cu<sup>II</sup>L3 HF-DFT (B3LYP)/6-31G\*/PCM optimized structure

ZPE corrected energy = -3017.063997 hartree

hexacoordinate tetragonal (distorted octahedral) geometry

(pdb format)

HEADER

|        |    |    |   |   |        |        |        |
|--------|----|----|---|---|--------|--------|--------|
| HETATM | 1  | CU | 2 | 2 | 0.869  | 0.805  | -0.514 |
| HETATM | 2  | O  | 2 | 2 | -0.855 | 0.836  | -1.652 |
| HETATM | 3  | N  | 2 | 2 | -0.106 | 2.279  | 0.400  |
| HETATM | 4  | N  | 2 | 2 | 1.524  | -0.532 | -1.835 |
| HETATM | 5  | O  | 2 | 2 | 2.524  | 2.270  | -1.683 |
| HETATM | 6  | H  | 2 | 2 | 2.946  | 2.051  | -0.826 |
| HETATM | 7  | C  | 2 | 2 | -0.725 | -1.535 | -1.255 |
| HETATM | 8  | O  | 2 | 2 | -0.468 | -1.354 | 0.147  |
| HETATM | 9  | H  | 2 | 2 | -1.298 | -2.457 | -1.414 |
| HETATM | 10 | C  | 2 | 2 | 0.611  | -1.700 | -1.971 |
| HETATM | 11 | H  | 2 | 2 | 1.100  | -2.563 | -1.512 |
| HETATM | 12 | C  | 2 | 2 | -1.703 | -1.031 | 0.774  |
| HETATM | 13 | O  | 2 | 2 | -2.404 | -2.177 | 1.165  |
| HETATM | 14 | H  | 2 | 2 | -1.458 | -0.407 | 1.636  |
| HETATM | 15 | C  | 2 | 2 | -2.586 | -0.384 | -0.333 |
| HETATM | 16 | O  | 2 | 2 | -3.613 | -1.323 | -0.567 |
| HETATM | 17 | H  | 2 | 2 | -2.987 | 0.598  | -0.056 |
| HETATM | 18 | C  | 2 | 2 | 2.962  | -0.908 | -1.606 |
| HETATM | 19 | H  | 2 | 2 | 3.242  | -1.714 | -2.295 |
| HETATM | 20 | H  | 2 | 2 | 3.533  | -0.017 | -1.883 |
| HETATM | 21 | C  | 2 | 2 | 3.236  | -1.306 | -0.182 |
| HETATM | 22 | C  | 2 | 2 | 3.814  | -2.540 | 0.131  |
| HETATM | 23 | C  | 2 | 2 | 4.131  | -2.876 | 1.448  |
| HETATM | 24 | C  | 2 | 2 | 3.859  | -1.961 | 2.468  |
| HETATM | 25 | C  | 2 | 2 | 3.268  | -0.733 | 2.179  |
| HETATM | 26 | C  | 2 | 2 | 2.945  | -0.386 | 0.857  |
| HETATM | 27 | H  | 2 | 2 | 4.032  | -3.240 | -0.673 |
| HETATM | 28 | H  | 2 | 2 | 4.583  | -3.837 | 1.673  |
| HETATM | 29 | H  | 2 | 2 | 4.102  | -2.208 | 3.498  |
| HETATM | 30 | H  | 2 | 2 | 3.052  | -0.017 | 2.967  |
| HETATM | 31 | C  | 2 | 2 | 0.276  | 2.817  | 1.571  |
| HETATM | 32 | C  | 2 | 2 | -0.420 | 3.869  | 2.156  |
| HETATM | 33 | C  | 2 | 2 | -1.546 | 4.372  | 1.505  |
| HETATM | 34 | C  | 2 | 2 | -1.941 | 3.811  | 0.289  |
| HETATM | 35 | C  | 2 | 2 | -1.192 | 2.762  | -0.237 |
| HETATM | 36 | H  | 2 | 2 | 1.164  | 2.376  | 2.012  |
| HETATM | 37 | H  | 2 | 2 | -0.084 | 4.280  | 3.102  |
| HETATM | 38 | H  | 2 | 2 | -2.115 | 5.189  | 1.937  |
| HETATM | 39 | H  | 2 | 2 | -2.813 | 4.181  | -0.241 |
| HETATM | 40 | C  | 2 | 2 | -1.491 | 2.126  | -1.581 |
| HETATM | 41 | H  | 2 | 2 | -2.564 | 2.042  | -1.770 |
| HETATM | 42 | H  | 2 | 2 | -1.053 | 2.724  | -2.388 |
| HETATM | 43 | C  | 2 | 2 | -1.670 | -0.361 | -1.573 |
| HETATM | 44 | H  | 2 | 2 | -2.232 | -0.474 | -2.503 |
| HETATM | 45 | H  | 2 | 2 | 1.496  | 0.005  | -2.702 |
| HETATM | 46 | O  | 2 | 2 | 2.393  | 0.815  | 0.591  |
| HETATM | 47 | C  | 2 | 2 | -3.723 | -2.170 | 0.591  |
| HETATM | 48 | C  | 2 | 2 | -4.076 | -3.574 | 0.133  |
| HETATM | 49 | H  | 2 | 2 | -4.120 | -4.247 | 0.994  |
| HETATM | 50 | H  | 2 | 2 | -5.051 | -3.572 | -0.361 |
| HETATM | 51 | H  | 2 | 2 | -3.323 | -3.944 | -0.567 |
| HETATM | 52 | C  | 2 | 2 | -4.723 | -1.588 | 1.587  |
| HETATM | 53 | H  | 2 | 2 | -4.755 | -2.203 | 2.491  |
| HETATM | 54 | H  | 2 | 2 | -4.440 | -0.570 | 1.876  |
| HETATM | 55 | H  | 2 | 2 | -5.723 | -1.556 | 1.144  |
| HETATM | 56 | H  | 2 | 2 | 0.437  | -1.932 | -3.028 |
| HETATM | 57 | H  | 2 | 2 | 2.767  | 3.187  | -1.887 |

Cu<sup>I</sup>L4 HF-DFT (B3LYP)/6-31G\*/PCM optimized structure

ZPE corrected energy = -3034.867246 hartree

Pentacoordinate distorted square pyramidal structure

(pdb format)

HEADER

|        |    |    |   |   |        |        |        |
|--------|----|----|---|---|--------|--------|--------|
| HETATM | 1  | C  | 2 | 2 | 5.522  | -1.631 | -1.307 |
| HETATM | 2  | C  | 2 | 2 | 4.419  | -2.097 | -0.357 |
| HETATM | 3  | C  | 2 | 2 | 4.788  | -3.346 | 0.425  |
| HETATM | 4  | H  | 2 | 2 | 3.959  | -3.641 | 1.074  |
| HETATM | 5  | H  | 2 | 2 | 5.672  | -3.156 | 1.041  |
| HETATM | 6  | H  | 2 | 2 | 5.009  | -4.167 | -0.262 |
| HETATM | 7  | H  | 2 | 2 | 5.729  | -2.404 | -2.052 |
| HETATM | 8  | H  | 2 | 2 | 6.440  | -1.423 | -0.748 |
| HETATM | 9  | H  | 2 | 2 | 5.222  | -0.719 | -1.834 |
| HETATM | 10 | O  | 2 | 2 | 3.212  | -2.344 | -1.102 |
| HETATM | 11 | O  | 2 | 2 | 4.077  | -1.059 | 0.570  |
| HETATM | 12 | C  | 2 | 2 | 3.035  | -0.285 | 0.006  |
| HETATM | 13 | H  | 2 | 2 | 3.410  | 0.637  | -0.451 |
| HETATM | 14 | C  | 2 | 2 | 2.354  | -1.242 | -1.010 |
| HETATM | 15 | H  | 2 | 2 | 2.147  | -0.832 | -2.001 |
| HETATM | 16 | C  | 2 | 2 | 1.955  | -0.043 | 1.076  |
| HETATM | 17 | H  | 2 | 2 | 2.391  | 0.121  | 2.069  |
| HETATM | 18 | O  | 2 | 2 | 1.079  | 1.013  | 0.703  |
| HETATM | 19 | C  | 2 | 2 | 1.532  | 2.354  | 0.781  |
| HETATM | 20 | H  | 2 | 2 | 1.696  | 2.645  | 1.831  |
| HETATM | 21 | H  | 2 | 2 | 2.486  | 2.496  | 0.251  |
| HETATM | 22 | C  | 2 | 2 | 0.441  | 3.174  | 0.145  |
| HETATM | 23 | N  | 2 | 2 | 0.480  | 4.526  | 0.006  |
| HETATM | 24 | C  | 2 | 2 | 1.567  | 5.409  | 0.415  |
| HETATM | 25 | H  | 2 | 2 | 1.269  | 6.440  | 0.227  |
| HETATM | 26 | H  | 2 | 2 | 2.477  | 5.196  | -0.155 |
| HETATM | 27 | C  | 2 | 2 | -0.697 | 4.905  | -0.609 |
| HETATM | 28 | H  | 2 | 2 | -0.910 | 5.939  | -0.835 |
| HETATM | 29 | C  | 2 | 2 | -1.407 | 3.757  | -0.819 |
| HETATM | 30 | H  | 2 | 2 | -2.376 | 3.640  | -1.278 |
| HETATM | 31 | N  | 2 | 2 | -0.691 | 2.673  | -0.346 |
| HETATM | 32 | CU | 2 | 2 | -1.093 | 0.825  | -0.259 |
| HETATM | 33 | C  | 2 | 2 | 1.142  | -1.347 | 0.976  |
| HETATM | 34 | H  | 2 | 2 | 1.749  | -2.139 | 1.435  |
| HETATM | 35 | O  | 2 | 2 | 1.091  | -1.595 | -0.447 |
| HETATM | 36 | H  | 2 | 2 | -0.345 | -1.150 | -1.541 |
| HETATM | 37 | O  | 2 | 2 | -1.047 | -0.539 | -1.853 |
| HETATM | 38 | H  | 2 | 2 | -1.834 | -1.091 | -1.993 |
| HETATM | 39 | C  | 2 | 2 | -0.248 | -1.461 | 1.602  |
| HETATM | 40 | H  | 2 | 2 | -0.713 | -2.348 | 1.161  |
| HETATM | 41 | H  | 2 | 2 | -0.113 | -1.673 | 2.674  |
| HETATM | 42 | N  | 2 | 2 | -1.183 | -0.321 | 1.427  |
| HETATM | 43 | C  | 2 | 2 | -2.553 | -0.686 | 1.905  |
| HETATM | 44 | C  | 2 | 2 | -3.314 | -1.490 | 0.882  |
| HETATM | 45 | C  | 2 | 2 | -3.838 | -0.853 | -0.258 |
| HETATM | 46 | O  | 2 | 2 | -3.639 | 0.505  | -0.359 |
| HETATM | 47 | C  | 2 | 2 | -4.527 | -1.575 | -1.234 |
| HETATM | 48 | C  | 2 | 2 | -4.710 | -2.952 | -1.076 |
| HETATM | 49 | C  | 2 | 2 | -4.210 | -3.601 | 0.051  |
| HETATM | 50 | C  | 2 | 2 | -3.518 | -2.866 | 1.017  |
| HETATM | 51 | H  | 2 | 2 | -3.136 | -3.367 | 1.903  |
| HETATM | 52 | H  | 2 | 2 | -4.356 | -4.669 | 0.180  |
| HETATM | 53 | H  | 2 | 2 | -5.251 | -3.507 | -1.836 |
| HETATM | 54 | H  | 2 | 2 | -4.934 | -1.063 | -2.104 |
| HETATM | 55 | H  | 2 | 2 | -2.495 | -1.243 | 2.851  |
| HETATM | 56 | H  | 2 | 2 | -3.071 | 0.257  | 2.101  |
| HETATM | 57 | H  | 2 | 2 | -0.849 | 0.419  | 2.044  |
| HETATM | 58 | H  | 2 | 2 | -4.173 | 0.857  | -1.089 |
| HETATM | 59 | H  | 2 | 2 | 1.773  | 5.295  | 1.484  |



Cu<sup>II</sup>L4 HF-DFT (B3LYP)/6-31G\*/PCM optimized structure

ZPE corrected energy = -3034.296723 hartree

hexacoordinate tetragonal (distorted octahedral) geometry

(pdb format)

HEADER

|        |    |    |   |   |        |        |        |
|--------|----|----|---|---|--------|--------|--------|
| HETATM | 1  | CU | 2 | 2 | 0.755  | 0.899  | -0.300 |
| HETATM | 2  | O  | 2 | 2 | -0.998 | 0.752  | -1.515 |
| HETATM | 3  | N  | 2 | 2 | -0.465 | 2.088  | 0.670  |
| HETATM | 4  | N  | 2 | 2 | 1.606  | -0.098 | -1.798 |
| HETATM | 5  | O  | 2 | 2 | 2.116  | 2.803  | -1.408 |
| HETATM | 6  | H  | 2 | 2 | 2.180  | 3.768  | -1.462 |
| HETATM | 7  | H  | 2 | 2 | 2.541  | 2.544  | -0.562 |
| HETATM | 8  | C  | 2 | 2 | -0.395 | -1.566 | -1.334 |
| HETATM | 9  | O  | 2 | 2 | -0.133 | -1.453 | 0.077  |
| HETATM | 10 | H  | 2 | 2 | -0.777 | -2.568 | -1.564 |
| HETATM | 11 | C  | 2 | 2 | 0.928  | -1.393 | -2.074 |
| HETATM | 12 | H  | 2 | 2 | 1.583  | -2.194 | -1.723 |
| HETATM | 13 | C  | 2 | 2 | -1.388 | -1.437 | 0.749  |
| HETATM | 14 | O  | 2 | 2 | -1.833 | -2.730 | 1.046  |
| HETATM | 15 | H  | 2 | 2 | -1.244 | -0.849 | 1.658  |
| HETATM | 16 | C  | 2 | 2 | -2.416 | -0.890 | -0.284 |
| HETATM | 17 | O  | 2 | 2 | -3.245 | -1.993 | -0.584 |
| HETATM | 18 | H  | 2 | 2 | -2.993 | -0.036 | 0.087  |
| HETATM | 19 | C  | 2 | 2 | 3.099  | -0.215 | -1.649 |
| HETATM | 20 | H  | 2 | 2 | 3.492  | -0.878 | -2.429 |
| HETATM | 21 | H  | 2 | 2 | 3.479  | 0.792  | -1.843 |
| HETATM | 22 | C  | 2 | 2 | 3.507  | -0.695 | -0.283 |
| HETATM | 23 | C  | 2 | 2 | 4.320  | -1.819 | -0.117 |
| HETATM | 24 | C  | 2 | 2 | 4.751  | -2.217 | 1.149  |
| HETATM | 25 | C  | 2 | 2 | 4.354  | -1.479 | 2.267  |
| HETATM | 26 | C  | 2 | 2 | 3.529  | -0.365 | 2.125  |
| HETATM | 27 | C  | 2 | 2 | 3.092  | 0.045  | 0.854  |
| HETATM | 28 | H  | 2 | 2 | 4.632  | -2.381 | -0.996 |
| HETATM | 29 | H  | 2 | 2 | 5.385  | -3.091 | 1.261  |
| HETATM | 30 | H  | 2 | 2 | 4.683  | -1.777 | 3.260  |
| HETATM | 31 | H  | 2 | 2 | 3.212  | 0.213  | 2.988  |
| HETATM | 32 | C  | 2 | 2 | -0.421 | 2.824  | 1.832  |
| HETATM | 33 | C  | 2 | 2 | -1.518 | 3.639  | 1.874  |
| HETATM | 34 | N  | 2 | 2 | -2.241 | 3.393  | 0.717  |
| HETATM | 35 | C  | 2 | 2 | -1.567 | 2.451  | 0.019  |
| HETATM | 36 | H  | 2 | 2 | 0.386  | 2.708  | 2.539  |
| HETATM | 37 | H  | 2 | 2 | -1.855 | 4.355  | 2.608  |
| HETATM | 38 | C  | 2 | 2 | -3.460 | 4.092  | 0.309  |
| HETATM | 39 | C  | 2 | 2 | -1.878 | 1.878  | -1.338 |
| HETATM | 40 | H  | 2 | 2 | -2.925 | 1.580  | -1.451 |
| HETATM | 41 | H  | 2 | 2 | -1.642 | 2.590  | -2.138 |
| HETATM | 42 | C  | 2 | 2 | -1.563 | -0.582 | -1.531 |
| HETATM | 43 | H  | 2 | 2 | -2.121 | -0.728 | -2.460 |
| HETATM | 44 | H  | 2 | 2 | 1.437  | 0.534  | -2.581 |
| HETATM | 45 | O  | 2 | 2 | 2.313  | 1.136  | 0.729  |
| HETATM | 46 | C  | 2 | 2 | -3.147 | -2.937 | 0.498  |
| HETATM | 47 | C  | 2 | 2 | -3.234 | -4.341 | -0.074 |
| HETATM | 48 | H  | 2 | 2 | -3.120 | -5.077 | 0.727  |
| HETATM | 49 | H  | 2 | 2 | -4.206 | -4.490 | -0.552 |
| HETATM | 50 | H  | 2 | 2 | -2.446 | -4.497 | -0.814 |
| HETATM | 51 | C  | 2 | 2 | -4.206 | -2.648 | 1.559  |
| HETATM | 52 | H  | 2 | 2 | -4.085 | -3.330 | 2.405  |
| HETATM | 53 | H  | 2 | 2 | -4.118 | -1.622 | 1.932  |
| HETATM | 54 | H  | 2 | 2 | -5.208 | -2.779 | 1.139  |
| HETATM | 55 | H  | 2 | 2 | -4.036 | 4.348  | 1.200  |
| HETATM | 56 | H  | 2 | 2 | -3.215 | 5.006  | -0.240 |
| HETATM | 57 | H  | 2 | 2 | -4.068 | 3.441  | -0.323 |
| HETATM | 58 | H  | 2 | 2 | 0.773  | -1.530 | -3.150 |

Cu<sup>I</sup>L3 HF-DFT (B3LYP)/6-31G\*/PCM optimized structure

ZPE corrected energy = -3017.631920 hartree

distorted tetrahedral geometry

(pdb format)

HEADER

|        |    |    |   |   |        |        |        |
|--------|----|----|---|---|--------|--------|--------|
| HETATM | 1  | CU | 2 | 2 | 0.982  | 0.992  | -0.019 |
| HETATM | 2  | O  | 2 | 2 | -1.059 | 1.160  | -0.729 |
| HETATM | 3  | N  | 2 | 2 | 0.789  | 2.880  | 0.033  |
| HETATM | 4  | N  | 2 | 2 | 1.164  | -0.374 | -1.480 |
| HETATM | 5  | O  | 2 | 2 | 1.049  | -0.090 | 1.773  |
| HETATM | 6  | H  | 2 | 2 | 0.361  | -0.770 | 1.619  |
| HETATM | 7  | H  | 2 | 2 | 1.884  | -0.572 | 1.904  |
| HETATM | 8  | C  | 2 | 2 | -1.206 | -1.218 | -0.878 |
| HETATM | 9  | O  | 2 | 2 | -1.159 | -1.323 | 0.564  |
| HETATM | 10 | H  | 2 | 2 | -1.862 | -2.014 | -1.255 |
| HETATM | 11 | C  | 2 | 2 | 0.168  | -1.484 | -1.494 |
| HETATM | 12 | H  | 2 | 2 | 0.593  | -2.332 | -0.955 |
| HETATM | 13 | C  | 2 | 2 | -2.419 | -0.882 | 1.075  |
| HETATM | 14 | O  | 2 | 2 | -3.309 | -1.947 | 1.252  |
| HETATM | 15 | H  | 2 | 2 | -2.211 | -0.390 | 2.027  |
| HETATM | 16 | C  | 2 | 2 | -3.061 | -0.002 | -0.035 |
| HETATM | 17 | O  | 2 | 2 | -4.121 | -0.791 | -0.537 |
| HETATM | 18 | H  | 2 | 2 | -3.405 | 0.976  | 0.323  |
| HETATM | 19 | C  | 2 | 2 | 2.543  | -0.882 | -1.793 |
| HETATM | 20 | H  | 2 | 2 | 2.503  | -1.591 | -2.628 |
| HETATM | 21 | H  | 2 | 2 | 3.117  | -0.009 | -2.117 |
| HETATM | 22 | C  | 2 | 2 | 3.220  | -1.508 | -0.598 |
| HETATM | 23 | C  | 2 | 2 | 3.862  | -0.703 | 0.352  |
| HETATM | 24 | C  | 2 | 2 | 4.475  | -1.244 | 1.483  |
| HETATM | 25 | C  | 2 | 2 | 4.463  | -2.630 | 1.667  |
| HETATM | 26 | C  | 2 | 2 | 3.849  | -3.456 | 0.728  |
| HETATM | 27 | C  | 2 | 2 | 3.231  | -2.900 | -0.399 |
| HETATM | 28 | H  | 2 | 2 | 3.895  | 0.372  | 0.184  |
| HETATM | 29 | H  | 2 | 2 | 4.976  | -0.598 | 2.198  |
| HETATM | 30 | H  | 2 | 2 | 4.939  | -3.072 | 2.537  |
| HETATM | 31 | H  | 2 | 2 | 3.844  | -4.535 | 0.867  |
| HETATM | 32 | C  | 2 | 2 | 1.681  | 3.719  | 0.611  |
| HETATM | 33 | C  | 2 | 2 | 1.458  | 5.079  | 0.768  |
| HETATM | 34 | C  | 2 | 2 | 0.253  | 5.620  | 0.323  |
| HETATM | 35 | C  | 2 | 2 | -0.676 | 4.768  | -0.269 |
| HETATM | 36 | C  | 2 | 2 | -0.378 | 3.415  | -0.407 |
| HETATM | 37 | H  | 2 | 2 | 2.605  | 3.267  | 0.954  |
| HETATM | 38 | H  | 2 | 2 | 2.217  | 5.697  | 1.238  |
| HETATM | 39 | H  | 2 | 2 | 0.038  | 6.678  | 0.435  |
| HETATM | 40 | H  | 2 | 2 | -1.629 | 5.147  | -0.627 |
| HETATM | 41 | C  | 2 | 2 | -1.350 | 2.495  | -1.123 |
| HETATM | 42 | H  | 2 | 2 | -2.382 | 2.772  | -0.875 |
| HETATM | 43 | H  | 2 | 2 | -1.232 | 2.589  | -2.215 |
| HETATM | 44 | C  | 2 | 2 | -1.952 | 0.110  | -1.093 |
| HETATM | 45 | H  | 2 | 2 | -2.341 | 0.238  | -2.110 |
| HETATM | 46 | H  | 2 | 2 | 0.916  | 0.233  | -2.263 |
| HETATM | 47 | C  | 2 | 2 | -4.505 | -1.728 | 0.478  |
| HETATM | 48 | C  | 2 | 2 | -4.913 | -3.030 | -0.190 |
| HETATM | 49 | H  | 2 | 2 | -5.166 | -3.776 | 0.568  |
| HETATM | 50 | H  | 2 | 2 | -5.786 | -2.867 | -0.827 |
| HETATM | 51 | H  | 2 | 2 | -4.091 | -3.412 | -0.802 |
| HETATM | 52 | C  | 2 | 2 | -5.595 | -1.139 | 1.372  |
| HETATM | 53 | H  | 2 | 2 | -5.832 | -1.834 | 2.184  |
| HETATM | 54 | H  | 2 | 2 | -5.265 | -0.194 | 1.816  |
| HETATM | 55 | H  | 2 | 2 | -6.502 | -0.952 | 0.790  |
| HETATM | 56 | H  | 2 | 2 | 0.014  | -1.821 | -2.529 |
| HETATM | 57 | O  | 2 | 2 | 2.605  | -3.675 | -1.337 |
| HETATM | 58 | H  | 2 | 2 | 2.721  | -4.613 | -1.114 |

Cu<sup>I</sup>L4 HF-DFT (B3LYP)/6-31G\*/PCM optimized structure

ZPE corrected energy = -3034.866598 hartree

distorted tetrahedral geometry

(pdb format)

HEADER

|        |    |    |   |   |        |        |        |
|--------|----|----|---|---|--------|--------|--------|
| HETATM | 1  | H  | 2 | 2 | -3.986 | -3.607 | 1.434  |
| HETATM | 2  | O  | 2 | 2 | -3.608 | -2.724 | 1.573  |
| HETATM | 3  | C  | 2 | 2 | -3.990 | -1.896 | 0.552  |
| HETATM | 4  | C  | 2 | 2 | -4.748 | -2.358 | -0.532 |
| HETATM | 5  | H  | 2 | 2 | -5.054 | -3.401 | -0.568 |
| HETATM | 6  | C  | 2 | 2 | -5.101 | -1.486 | -1.558 |
| HETATM | 7  | H  | 2 | 2 | -5.690 | -1.855 | -2.393 |
| HETATM | 8  | C  | 2 | 2 | -4.711 | -0.144 | -1.508 |
| HETATM | 9  | H  | 2 | 2 | -5.007 | 0.546  | -2.293 |
| HETATM | 10 | C  | 2 | 2 | -3.962 | 0.305  | -0.420 |
| HETATM | 11 | H  | 2 | 2 | -3.673 | 1.353  | -0.359 |
| HETATM | 12 | C  | 2 | 2 | -3.579 | -0.554 | 0.619  |
| HETATM | 13 | C  | 2 | 2 | -2.741 | -0.031 | 1.761  |
| HETATM | 14 | H  | 2 | 2 | -2.890 | -0.641 | 2.660  |
| HETATM | 15 | H  | 2 | 2 | -3.048 | 0.993  | 1.993  |
| HETATM | 16 | N  | 2 | 2 | -1.284 | 0.045  | 1.416  |
| HETATM | 17 | O  | 2 | 2 | -1.138 | -0.019 | -1.884 |
| HETATM | 18 | H  | 2 | 2 | -2.078 | -0.238 | -2.011 |
| HETATM | 19 | H  | 2 | 2 | -0.698 | -0.854 | -1.626 |
| HETATM | 20 | C  | 2 | 2 | -0.621 | -1.279 | 1.580  |
| HETATM | 21 | H  | 2 | 2 | -0.537 | -1.522 | 2.649  |
| HETATM | 22 | H  | 2 | 2 | -1.268 | -2.042 | 1.141  |
| HETATM | 23 | C  | 2 | 2 | 0.758  | -1.460 | 0.948  |
| HETATM | 24 | O  | 2 | 2 | 0.647  | -1.637 | -0.482 |
| HETATM | 25 | H  | 2 | 2 | 1.168  | -2.384 | 1.376  |
| HETATM | 26 | C  | 2 | 2 | 1.958  | -1.586 | -1.039 |
| HETATM | 27 | H  | 2 | 2 | 1.859  | -1.118 | -2.021 |
| HETATM | 28 | O  | 2 | 2 | 2.526  | -2.861 | -1.154 |
| HETATM | 29 | C  | 2 | 2 | 3.765  | -2.919 | -0.424 |
| HETATM | 30 | O  | 2 | 2 | 3.683  | -1.851 | 0.529  |
| HETATM | 31 | C  | 2 | 2 | 4.937  | -2.701 | -1.379 |
| HETATM | 32 | H  | 2 | 2 | 4.853  | -1.733 | -1.884 |
| HETATM | 33 | H  | 2 | 2 | 5.883  | -2.725 | -0.829 |
| HETATM | 34 | H  | 2 | 2 | 4.952  | -3.485 | -2.142 |
| HETATM | 35 | H  | 2 | 2 | 4.749  | -4.272 | 0.935  |
| HETATM | 36 | C  | 2 | 2 | 3.839  | -4.236 | 0.329  |
| HETATM | 37 | H  | 2 | 2 | 2.971  | -4.344 | 0.984  |
| HETATM | 38 | H  | 2 | 2 | 3.856  | -5.071 | -0.377 |
| HETATM | 39 | C  | 2 | 2 | 2.847  | -0.842 | -0.004 |
| HETATM | 40 | H  | 2 | 2 | 3.423  | -0.019 | -0.440 |
| HETATM | 41 | H  | 2 | 2 | 2.315  | -0.356 | 2.076  |
| HETATM | 42 | C  | 2 | 2 | 1.855  | -0.386 | 1.081  |
| HETATM | 43 | O  | 2 | 2 | 1.256  | 0.861  | 0.740  |
| HETATM | 44 | Cu | 2 | 2 | -0.785 | 1.161  | -0.184 |
| HETATM | 45 | H  | 2 | 2 | -0.863 | 0.656  | 2.115  |
| HETATM | 46 | C  | 2 | 2 | 2.012  | 2.058  | 0.863  |
| HETATM | 47 | H  | 2 | 2 | 2.994  | 1.973  | 0.376  |
| HETATM | 48 | H  | 2 | 2 | 2.190  | 2.289  | 1.925  |
| HETATM | 49 | C  | 2 | 2 | 1.174  | 3.117  | 0.197  |
| HETATM | 50 | N  | 2 | 2 | -0.044 | 2.903  | -0.299 |
| HETATM | 51 | N  | 2 | 2 | 1.548  | 4.412  | 0.032  |
| HETATM | 52 | C  | 2 | 2 | 2.819  | 5.007  | 0.435  |
| HETATM | 53 | C  | 2 | 2 | 0.507  | 5.057  | -0.608 |
| HETATM | 54 | H  | 2 | 2 | 0.559  | 6.106  | -0.857 |
| HETATM | 55 | C  | 2 | 2 | -0.465 | 4.118  | -0.806 |
| HETATM | 56 | H  | 2 | 2 | -1.430 | 4.232  | -1.276 |
| HETATM | 57 | H  | 2 | 2 | 2.776  | 6.080  | 0.248  |
| HETATM | 58 | H  | 2 | 2 | 2.996  | 4.845  | 1.502  |
| HETATM | 59 | H  | 2 | 2 | 3.646  | 4.581  | -0.141 |

### Cu<sup>I</sup>L3 HF-DFT (B3LYP)/6-31G\*/PCM optimized structure

ZPE corrected energy = -3017.622645 hartree

other pentacoordinate distorted square pyramidal structure

(pdb format)

#### HEADER

```
HETATM 1 CU 2 2 0.863 1.214 -0.324
HETATM 2 O 2 2 -1.060 0.713 -1.634
HETATM 3 N 2 2 -0.323 2.609 0.179
HETATM 4 N 2 2 1.488 -0.165 -1.676
HETATM 5 O 2 2 2.619 2.731 -0.452
HETATM 6 H 2 2 3.501 2.822 -0.054
HETATM 7 C 2 2 -0.605 -1.581 -1.180
HETATM 8 O 2 2 -0.501 -1.497 0.260
HETATM 9 H 2 2 -0.989 -2.576 -1.440
HETATM 10 C 2 2 0.785 -1.473 -1.804
HETATM 11 H 2 2 1.402 -2.233 -1.315
HETATM 12 C 2 2 -1.793 -1.248 0.814
HETATM 13 O 2 2 -2.420 -2.424 1.233
HETATM 14 H 2 2 -1.641 -0.575 1.661
HETATM 15 C 2 2 -2.663 -0.709 -0.349
HETATM 16 O 2 2 -3.547 -1.776 -0.639
HETATM 17 H 2 2 -3.202 0.210 -0.093
HETATM 18 C 2 2 2.963 -0.327 -1.613
HETATM 19 H 2 2 3.329 -0.903 -2.476
HETATM 20 H 2 2 3.375 0.684 -1.706
HETATM 21 C 2 2 3.493 -0.979 -0.347
HETATM 22 C 2 2 4.699 -1.692 -0.444
HETATM 23 C 2 2 5.315 -2.254 0.671
HETATM 24 C 2 2 4.722 -2.122 1.927
HETATM 25 C 2 2 3.519 -1.431 2.050
HETATM 26 C 2 2 2.910 -0.868 0.927
HETATM 27 H 2 2 5.162 -1.802 -1.422
HETATM 28 H 2 2 6.249 -2.797 0.557
HETATM 29 H 2 2 5.189 -2.557 2.806
HETATM 30 H 2 2 3.031 -1.315 3.013
HETATM 31 C 2 2 -0.035 3.390 1.246
HETATM 32 C 2 2 -0.955 4.249 1.833
HETATM 33 C 2 2 -2.247 4.310 1.312
HETATM 34 C 2 2 -2.554 3.516 0.207
HETATM 35 C 2 2 -1.575 2.689 -0.338
HETATM 36 H 2 2 0.981 3.322 1.617
HETATM 37 H 2 2 -0.661 4.851 2.686
HETATM 38 H 2 2 -2.997 4.961 1.750
HETATM 39 H 2 2 -3.544 3.543 -0.239
HETATM 40 C 2 2 -1.831 1.910 -1.615
HETATM 41 H 2 2 -2.900 1.719 -1.754
HETATM 42 H 2 2 -1.492 2.509 -2.471
HETATM 43 C 2 2 -1.696 -0.555 -1.539
HETATM 44 H 2 2 -2.209 -0.802 -2.476
HETATM 45 H 2 2 1.284 0.357 -2.526
HETATM 46 O 2 2 1.708 -0.179 1.131
HETATM 47 H 2 2 0.958 -0.811 1.033
HETATM 48 C 2 2 -3.660 -2.607 0.522
HETATM 49 C 2 2 -3.773 -4.054 0.076
HETATM 50 H 2 2 -3.812 -4.713 0.948
HETATM 51 H 2 2 -4.684 -4.196 -0.513
HETATM 52 H 2 2 -2.908 -4.326 -0.535
HETATM 53 C 2 2 -4.824 -2.152 1.402
HETATM 54 H 2 2 -4.859 -2.747 2.318
HETATM 55 H 2 2 -4.710 -1.099 1.681
HETATM 56 H 2 2 -5.771 -2.269 0.867
HETATM 57 H 2 2 0.708 -1.762 -2.861
HETATM 58 H 2 2 2.454 3.575 -0.902
```

Cu<sup>I</sup>L4 HF-DFT (B3LYP)/6-31G\*/PCM optimized structure

ZPE corrected energy = -3034.858171 hartree

other pentacoordinate distorted square pyramidal structure

(pdb format)

HEADER

```
HETATM 1 CU 2 2 -0.930 1.272 -0.015
HETATM 2 O 2 2 1.232 0.774 1.003
HETATM 3 N 2 2 0.189 2.737 -0.444
HETATM 4 N 2 2 -1.392 0.063 1.587
HETATM 5 O 2 2 -2.693 2.814 0.194
HETATM 6 H 2 2 -2.376 3.682 0.491
HETATM 7 C 2 2 0.613 -1.515 1.213
HETATM 8 O 2 2 0.403 -1.718 -0.204
HETATM 9 H 2 2 0.984 -2.456 1.642
HETATM 10 C 2 2 -0.715 -1.225 1.903
HETATM 11 H 2 2 -1.389 -2.037 1.613
HETATM 12 C 2 2 1.671 -1.709 -0.862
HETATM 13 O 2 2 2.174 -2.999 -1.049
HETATM 14 H 2 2 1.517 -1.216 -1.824
HETATM 15 C 2 2 2.660 -1.022 0.115
HETATM 16 O 2 2 3.463 -2.085 0.596
HETATM 17 H 2 2 3.262 -0.241 -0.363
HETATM 18 C 2 2 -2.870 -0.068 1.619
HETATM 19 H 2 2 -3.208 -0.498 2.574
HETATM 20 H 2 2 -3.258 0.954 1.571
HETATM 21 C 2 2 -3.464 -0.893 0.489
HETATM 22 C 2 2 -4.663 -1.578 0.743
HETATM 23 C 2 2 -5.331 -2.289 -0.251
HETATM 24 C 2 2 -4.799 -2.339 -1.540
HETATM 25 C 2 2 -3.603 -1.681 -1.815
HETATM 26 C 2 2 -2.941 -0.968 -0.814
HETATM 27 H 2 2 -5.078 -1.545 1.748
HETATM 28 H 2 2 -6.258 -2.804 -0.017
HETATM 29 H 2 2 -5.307 -2.891 -2.325
HETATM 30 H 2 2 -3.161 -1.705 -2.806
HETATM 31 C 2 2 -0.051 3.858 -1.219
HETATM 32 C 2 2 1.041 4.679 -1.186
HETATM 33 N 2 2 1.973 4.054 -0.381
HETATM 34 C 2 2 1.418 2.887 0.043
HETATM 35 H 2 2 -0.980 3.984 -1.752
HETATM 36 H 2 2 1.245 5.630 -1.656
HETATM 37 C 2 2 3.300 4.557 -0.042
HETATM 38 C 2 2 2.093 1.899 0.956
HETATM 39 H 2 2 3.091 1.643 0.575
HETATM 40 H 2 2 2.230 2.313 1.968
HETATM 41 C 2 2 1.777 -0.510 1.269
HETATM 42 H 2 2 2.312 -0.536 2.226
HETATM 43 H 2 2 -1.139 0.714 2.328
HETATM 44 O 2 2 -1.749 -0.325 -1.172
HETATM 45 H 2 2 -0.998 -0.939 -0.987
HETATM 46 C 2 2 3.438 -3.143 -0.370
HETATM 47 C 2 2 3.463 -4.472 0.365
HETATM 48 H 2 2 3.399 -5.297 -0.350
HETATM 49 H 2 2 4.394 -4.570 0.931
HETATM 50 H 2 2 2.618 -4.535 1.056
HETATM 51 C 2 2 4.577 -2.985 -1.375
HETATM 52 H 2 2 4.508 -3.757 -2.147
HETATM 53 H 2 2 4.530 -2.007 -1.865
HETATM 54 H 2 2 5.543 -3.074 -0.870
HETATM 55 H 2 2 3.455 5.506 -0.557
HETATM 56 H 2 2 3.388 4.723 1.035
HETATM 57 H 2 2 4.073 3.853 -0.366
HETATM 58 H 2 2 -0.560 -1.319 2.987
HETATM 59 H 2 2 -3.587 2.972 -0.152
```

Cu<sup>II</sup>L3 HF-DFT (B3LYP)/6-31G\*/PCM optimized structure

ZPE corrected energy = -3017.065546 hartree

pentacoordinate distorted square pyramidal structure

(pdb format)

HEADER

```
HETATM 1 CU 2 2 -1.208 0.444 0.166
HETATM 2 O 2 2 0.734 1.120 0.561
HETATM 3 N 2 2 -1.462 2.424 0.005
HETATM 4 N 2 2 -0.854 -0.905 1.654
HETATM 5 O 2 2 -0.642 -0.418 -1.758
HETATM 6 H 2 2 0.110 -1.019 -1.577
HETATM 7 H 2 2 -1.372 -0.967 -2.092
HETATM 8 C 2 2 1.575 -1.165 0.864
HETATM 9 O 2 2 1.610 -1.407 -0.560
HETATM 10 H 2 2 2.442 -1.670 1.309
HETATM 11 C 2 2 0.324 -1.793 1.493
HETATM 12 H 2 2 0.028 -2.630 0.853
HETATM 13 C 2 2 2.712 -0.670 -1.094
HETATM 14 O 2 2 3.883 -1.432 -1.113
HETATM 15 H 2 2 2.420 -0.370 -2.103
HETATM 16 C 2 2 2.998 0.480 -0.085
HETATM 17 O 2 2 4.230 0.131 0.507
HETATM 18 H 2 2 3.026 1.471 -0.552
HETATM 19 C 2 2 -2.108 -1.676 1.974
HETATM 20 H 2 2 -1.880 -2.470 2.695
HETATM 21 H 2 2 -2.776 -0.956 2.458
HETATM 22 C 2 2 -2.758 -2.231 0.738
HETATM 23 C 2 2 -3.206 -1.299 -0.238
HETATM 24 C 2 2 -3.862 -1.789 -1.386
HETATM 25 C 2 2 -4.066 -3.159 -1.555
HETATM 26 C 2 2 -3.614 -4.071 -0.598
HETATM 27 C 2 2 -2.960 -3.598 0.543
HETATM 28 O 2 2 -3.013 0.009 -0.061
HETATM 29 H 2 2 -4.226 -1.072 -2.118
HETATM 30 H 2 2 -4.581 -3.516 -2.443
HETATM 31 H 2 2 -3.767 -5.137 -0.737
HETATM 32 C 2 2 -2.596 2.977 -0.459
HETATM 33 C 2 2 -2.724 4.350 -0.635
HETATM 34 C 2 2 -1.637 5.169 -0.332
HETATM 35 C 2 2 -0.460 4.592 0.142
HETATM 36 C 2 2 -0.412 3.210 0.303
HETATM 37 H 2 2 -3.396 2.277 -0.676
HETATM 38 H 2 2 -3.655 4.763 -1.008
HETATM 39 H 2 2 -1.700 6.245 -0.466
HETATM 40 H 2 2 0.405 5.202 0.384
HETATM 41 C 2 2 0.806 2.521 0.876
HETATM 42 H 2 2 1.722 2.956 0.463
HETATM 43 H 2 2 0.837 2.641 1.969
HETATM 44 C 2 2 1.880 0.340 0.965
HETATM 45 H 2 2 2.209 0.646 1.964
HETATM 46 H 2 2 -0.667 -0.309 2.463
HETATM 47 C 2 2 4.926 -0.754 -0.386
HETATM 48 C 2 2 5.700 -1.767 0.437
HETATM 49 H 2 2 6.200 -2.481 -0.224
HETATM 50 H 2 2 6.457 -1.258 1.041
HETATM 51 H 2 2 5.024 -2.312 1.100
HETATM 52 C 2 2 5.801 0.039 -1.355
HETATM 53 H 2 2 6.274 -0.637 -2.073
HETATM 54 H 2 2 5.205 0.768 -1.913
HETATM 55 H 2 2 6.581 0.575 -0.806
HETATM 56 H 2 2 0.596 -2.214 2.469
HETATM 57 H 2 2 -2.615 -4.300 1.299
```

Cu<sup>II</sup>L4 HF-DFT (B3LYP)/6-31G\*/PCM optimized structure

ZPE corrected energy = -3034.298108 hartree

pentacoordinate distorted square pyramidal structure

(pdb format)

HEADER

```
HETATM 1 C 2 2 5.677 -0.840 -1.353
HETATM 2 C 2 2 4.713 -1.442 -0.333
HETATM 3 C 2 2 5.354 -2.490 0.558
HETATM 4 H 2 2 4.617 -2.894 1.257
HETATM 5 H 2 2 6.177 -2.046 1.126
HETATM 6 H 2 2 5.750 -3.307 -0.051
HETATM 7 H 2 2 6.051 -1.620 -2.023
HETATM 8 H 2 2 6.525 -0.375 -0.843
HETATM 9 H 2 2 5.178 -0.078 -1.961
HETATM 10 O 2 2 3.584 -2.025 -1.012
HETATM 11 O 2 2 4.148 -0.414 0.497
HETATM 12 C 2 2 2.967 0.052 -0.119
HETATM 13 H 2 2 3.123 0.997 -0.653
HETATM 14 C 2 2 2.525 -1.114 -1.049
HETATM 15 H 2 2 2.271 -0.846 -2.077
HETATM 16 C 2 2 1.850 0.131 0.941
HETATM 17 H 2 2 2.234 0.447 1.917
HETATM 18 O 2 2 0.807 1.028 0.507
HETATM 19 C 2 2 1.091 2.426 0.663
HETATM 20 H 2 2 1.269 2.647 1.726
HETATM 21 H 2 2 1.996 2.702 0.106
HETATM 22 C 2 2 -0.115 3.147 0.138
HETATM 23 N 2 2 -0.244 4.478 -0.071
HETATM 24 C 2 2 0.755 5.512 0.195
HETATM 25 H 2 2 0.503 6.400 -0.386
HETATM 26 H 2 2 1.744 5.165 -0.116
HETATM 27 C 2 2 -1.534 4.691 -0.529
HETATM 28 H 2 2 -1.890 5.682 -0.770
HETATM 29 C 2 2 -2.137 3.465 -0.586
HETATM 30 H 2 2 -3.135 3.195 -0.895
HETATM 31 N 2 2 -1.239 2.512 -0.165
HETATM 32 CU 2 2 -1.263 0.545 0.033
HETATM 33 C 2 2 1.342 -1.322 0.934
HETATM 34 H 2 2 2.132 -1.912 1.416
HETATM 35 O 2 2 1.338 -1.659 -0.470
HETATM 36 H 2 2 -0.094 -1.185 -1.548
HETATM 37 O 2 2 -0.745 -0.500 -1.803
HETATM 38 H 2 2 -1.538 -0.964 -2.124
HETATM 39 C 2 2 0.021 -1.735 1.594
HETATM 40 H 2 2 -0.355 -2.599 1.039
HETATM 41 H 2 2 0.234 -2.075 2.616
HETATM 42 N 2 2 -1.056 -0.715 1.632
HETATM 43 C 2 2 -2.391 -1.315 1.987
HETATM 44 C 2 2 -3.077 -1.904 0.788
HETATM 45 C 2 2 -3.415 -1.015 -0.271
HETATM 46 O 2 2 -3.099 0.278 -0.194
HETATM 47 C 2 2 -4.100 -1.531 -1.390
HETATM 48 C 2 2 -4.438 -2.883 -1.454
HETATM 49 C 2 2 -4.094 -3.754 -0.416
HETATM 50 C 2 2 -3.413 -3.255 0.698
HETATM 51 H 2 2 -3.152 -3.924 1.515
HETATM 52 H 2 2 -4.351 -4.807 -0.473
HETATM 53 H 2 2 -4.972 -3.260 -2.322
HETATM 54 H 2 2 -4.379 -0.844 -2.185
HETATM 55 H 2 2 -2.263 -2.062 2.780
HETATM 56 H 2 2 -2.984 -0.487 2.389
HETATM 57 H 2 2 -0.821 -0.065 2.384
HETATM 58 H 2 2 0.774 5.771 1.258
```
